# Supplementary material for: Lifestyle Pathways Affecting Children’s Mental Health in Japan during the COVID-19 Pandemic
Source: MDPI journal article supplement (doi:10.3390/children10060943), 2023-05-26
Supplement: s1 [file s1]

Table S1. Factor structure for pre-school children.

| Variable                                                          | <i>M</i> | <i>SD</i> | I     | II    | III   | IV    | V     |
|-------------------------------------------------------------------|----------|-----------|-------|-------|-------|-------|-------|
| <b>I</b> “Sleeping habits” ( $\alpha=.78$ )                       |          |           |       |       |       |       |       |
| 1. bedtime on the holidays                                        | 2.79     | .72       | .83   | .01   | .03   | -.03  | .01   |
| 2. wake-up time on the holidays                                   | 1.87     | .71       | .62   | .01   | -.03  | -.01  | .01   |
| 3. wake-up time on the weekdays                                   | 2.51     | .61       | .52   | -.02  | -.01  | .05   | -.05  |
| 4. bedtime on the weekdays                                        | 2.98     | .64       | .77   | -.01  | .01   | .03   | .01   |
| <b>II</b> “Physical/psychosocial health (PPH)” ( $\alpha=.71$ )   |          |           |       |       |       |       |       |
| 5. Do you feel tired as soon as you do some-thing?                | 3.20     | .86       | -.03  | .58   | .09   | -.04  | .03   |
| 6. Do you yawn from the morning?                                  | 3.13     | .89       | .11   | .54   | -.04  | .02   | -.01  |
| 7. Do you have abdominal pain?                                    | 3.36     | .77       | -.01  | .54   | -.01  | -.16  | .02   |
| 8. Do you feel sleepy in the daytime?                             | 2.99     | .91       | -.01  | .49   | -.04  | .04   | .00   |
| 9. Do you feel sick?                                              | 3.73     | .55       | .00   | .51   | .00   | -.08  | .00   |
| 10. Do you feel irritated?                                        | 2.68     | .91       | .01   | .50   | .00   | .16   | -.06  |
| 11. Do you wake up in the middle of your sleep?                   | 3.07     | .90       | -.08  | .43   | -.01  | .09   | -.01  |
| <b>III</b> “Physical activity” ( $\alpha=.76$ )                   |          |           |       |       |       |       |       |
| 12. Do you use a variety of exercise and playground equipment?    | 3.16     | .77       | .00   | -.02  | .78   | .04   | -.05  |
| 13. Do you exercise to the point of sweating?                     | 3.11     | .78       | .00   | -.02  | .73   | -.02  | -.01  |
| 14. Do you play outside?                                          | 3.09     | .72       | .00   | .04   | .60   | -.02  | .02   |
| 15. Do parents and children engage in physical exercise together? | 2.70     | .77       | .00   | .00   | .53   | -.01  | .09   |
| <b>IV</b> “Life skills” ( $\alpha=.74$ )                          |          |           |       |       |       |       |       |
| 16. Can you fold your own clothes when you take them off?         | 2.83     | .95       | -.04  | -.04  | .04   | .75   | -.06  |
| 17. Can you clean up after playing?                               | 2.73     | .81       | -.02  | .02   | .03   | .64   | -.03  |
| 18. Do you try to get ready for the next day by yourself?         | 2.58     | .98       | .08   | -.04  | -.05  | .59   | .03   |
| 19. Can you eat in a well manner?                                 | 2.74     | .74       | .01   | .05   | -.02  | .59   | .10   |
| <b>V</b> “Healthy diet” ( $\alpha=.77$ )                          |          |           |       |       |       |       |       |
| 20. Can you eat without liking it?                                | 2.49     | .88       | -.02  | .01   | .00   | .07   | .90   |
| 21. Do you like vegetables?                                       | 2.63     | .88       | .00   | -.02  | .03   | -.05  | .69   |
| first eigen value                                                 |          |           | 3.99  | 2.27  | 2.07  | 1.81  | 1.21  |
| contribution (%)                                                  |          |           | 19.02 | 29.83 | 39.68 | 48.31 | 54.05 |

Table S2. Factor structure for elementary school children.

| Variable                                                                 | <i>M</i> | <i>SD</i> | I     | II    | III   | IV    | V     |
|--------------------------------------------------------------------------|----------|-----------|-------|-------|-------|-------|-------|
| <b>I “Life skills” (<math>\alpha=.78</math>)</b>                         |          |           |       |       |       |       |       |
| 1. Can you clean up after playing?                                       | 2.88     | .86       | .78   | -.01  | .01   | .00   | -.06  |
| 2. Can you fold your own clothes when you take them off?                 | 2.88     | .94       | .77   | -.04  | .00   | .05   | -.04  |
| 3. Can you eat in a well manner?                                         | 3.04     | .76       | .59   | .01   | -.01  | -.04  | .12   |
| 4. Do you try to get ready for the next day by yourself?                 | 3.13     | .90       | .58   | .05   | -.02  | .02   | .02   |
| <b>II “Physical/psychosocial health (PPH)” (<math>\alpha=.72</math>)</b> |          |           |       |       |       |       |       |
| 5. Do you have abdominal pain?                                           | 3.08     | .92       | -.09  | .61   | -.05  | -.02  | .03   |
| 6. Do you feel sick?                                                     | 3.57     | .69       | -.05  | .56   | -.07  | -.05  | .06   |
| 7. Do you feel tired as soon as you do some-thing?                       | 3.10     | .93       | .04   | .56   | .17   | -.05  | .01   |
| 8. Do you feel sleepy in the daytime?                                    | 3.19     | .91       | -.02  | .54   | -.02  | .13   | -.05  |
| 9. Do you yawn from the morning?                                         | 2.77     | 1.04      | .01   | .52   | .00   | .14   | -.05  |
| 10. Do you feel irritated?                                               | 2.45     | .96       | .15   | .45   | .01   | -.01  | -.01  |
| 11. Do you wake up in the middle of your sleep?                          | 3.27     | .83       | .03   | .43   | -.02  | -.13  | -.02  |
| <b>III “Physical activity” (<math>\alpha=.78</math>)</b>                 |          |           |       |       |       |       |       |
| 12. Do you use a variety of exercise and playground equipment?           | 2.93     | .92       | .04   | -.02  | .76   | .01   | -.02  |
| 13. Do you exercise to the point of sweating?                            | 3.12     | .86       | -.04  | -.01  | .75   | -.07  | .04   |
| 14. Do you play outside?                                                 | 2.79     | .91       | -.03  | .00   | .68   | .03   | .00   |
| 15. Do parents and children engage in physical exercise together?        | 2.54     | .90       | .02   | .00   | .56   | .05   | .00   |
| <b>IV “Sleeping habits” (<math>\alpha=.75</math>)</b>                    |          |           |       |       |       |       |       |
| 16. bedtime on the holidays                                              | 2.31     | .78       | -.02  | .00   | .00   | .88   | .02   |
| 17. bedtime on the weekdays                                              | 2.66     | .70       | .00   | -.05  | .01   | .81   | .00   |
| 18. wake-up time on the holidays                                         | 1.89     | .79       | -.03  | .05   | .00   | .54   | .03   |
| 19. wake-up time on the weekdays                                         | 2.90     | .42       | .09   | -.03  | -.01  | .40   | -.02  |
| <b>V “Healthy diet” (<math>\alpha=.71</math>)</b>                        |          |           |       |       |       |       |       |
| 20. Can you eat without liking it?                                       | 2.92     | .90       | .06   | .03   | -.03  | .01   | .81   |
| 21. Do you like vegetables?                                              | 3.00     | .89       | -.04  | -.03  | .04   | .02   | .67   |
| first eigen value                                                        |          |           | 3.98  | 2.38  | 1.98  | 1.92  | 1.26  |
| contribution (%)                                                         |          |           | 18.97 | 30.32 | 39.76 | 48.91 | 54.91 |
